# Supplementary material for: The Effects of BSA-Stabilized Selenium Nanoparticles and Sodium Selenite Supplementation on the Structure, Oxidative Stress Parameters and Selenium Redox Biology in Rat Placenta
Source: MDPI journal article supplement (doi:10.3390/ijms232113068), 2022-10-28

# The Effects of BSA-Stabilized Selenium Nanoparticles and Sodium Selenite Supplementation on the Structure, Oxidative Stress Parameters and Selenium Redox Biology in Rat Placenta

Milica Manojlović-Stojanoski<sup>1</sup>, Slavica Borković-Mitić<sup>1</sup>, Nataša Nestorović<sup>1</sup>, Nataša Ristić<sup>1</sup>, Svetlana Trifunović<sup>1</sup>, Magdalena Stevanović<sup>2</sup>, Nenad Filipović<sup>2</sup>, Aleksandar Stojsavljević<sup>3,4</sup>, Slađan Pavlović<sup>1\*</sup>

<sup>1</sup>Institute for Biological Research “Siniša Stanković” – National Institute of the Republic of Serbia, University of Belgrade, Bulevar Despota Stefana 142, 11060 Belgrade, Serbia

<sup>2</sup>Group for Biomedical Engineering and Nanobiotechnology, Institute of Technical Sciences of the Serbian Academy of Sciences and Arts (SASA), Kneza Mihaila 35/IV, 11000 Belgrade, Serbia

<sup>3</sup>Faculty of Chemistry, University of Belgrade, Studentski trg 12-16, 11000 Belgrade, Serbia

<sup>4</sup>Innovative Centre of the Faculty of Chemistry, University of Belgrade, Studentski trg 12-16, 11000 Belgrade, Serbia

\* Correspondence: sladjan@ibiss.bg.ac.rs

## Supplementary material

Table S1. Chemical composition of rat diet.

| Chemical composition of rat diet |            |                  |                 |                           |                 |
|----------------------------------|------------|------------------|-----------------|---------------------------|-----------------|
| General                          |            | Vitamins         |                 | Minerals                  |                 |
| Proteins                         | min 20.00% | Vit A            | min 12.000 U/kg | Zinc                      | min 30 mg/kg    |
| Fat                              | min 5.00%  | Vit D3           | min 2.000 U/kg  | Copper                    | min 15.00 mg/kg |
| Humidity                         | max 11.5%  | Vit E            | min 30.00 mg/kg | Iron                      | min 60 mg/kg    |
| Cellulose                        | max 5.00%  | Vit B1           | min 4.00 mg/kg  | Manganese                 | min 60 mg/kg    |
| Ashes                            | max 8.00%  | Vit B2           | min 7.00 mg/kg  | Iodine                    | min 0.15 mg/kg  |
| Calcium                          | min 0.95%  | Vit B6           | min 6 mg/kg     | Selenium                  | min 0.30 mg/kg  |
| Phosphorus                       | min 0.70%  | Vit B12          | min 0.05 mg/kg  |                           |                 |
| Lysine                           | min 0.60%  | Folic acid       | min 1.0 mg/kg   |                           |                 |
| Methionin                        | min 0.60%  | Choline chloride | 1.000.00 mg/kg  | <b>Antioxidants</b>       |                 |
| Tryptophan                       | max 0.15%  | Niacin           | 20.00 mg/kg     | E-321, E-320, E-338, E202 | min 125 mg/kg   |
|                                  |            | Pantothenic acid | min 10.00 mg/kg |                           |                 |

**Figure S1.** Body weight of gravid females on day 21 of pregnancy. IC-Intact controls; C-Controls; SeNPs-Selenium nanoparticles; NaSe-Sodium selenite. Significantly different: <sup>A</sup>SeNPs vs IC; <sup>B</sup>SeNPs vs C, P<0.05

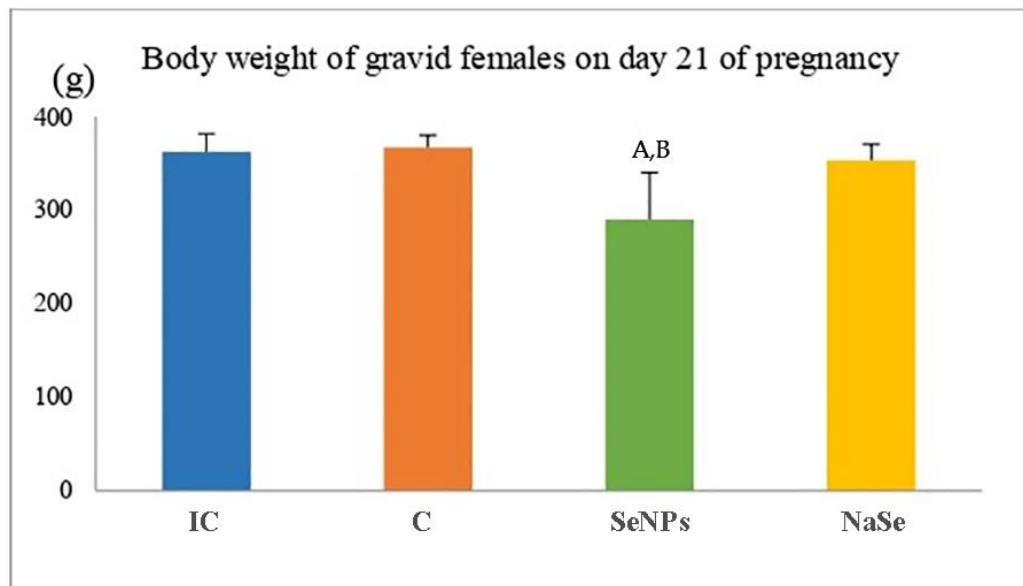

**Figure S2.** Absolut volume of the placenta and the volume density of placental layers in female (F) and male fetuses (M) on day 21 of pregnancy. IF-intact females; IM-Intact males; CF-Control females; CM-Control males; NF-Nanoselenium females; NM-Nanoselenium males; SF-Selenite females; SM-Selenite males.

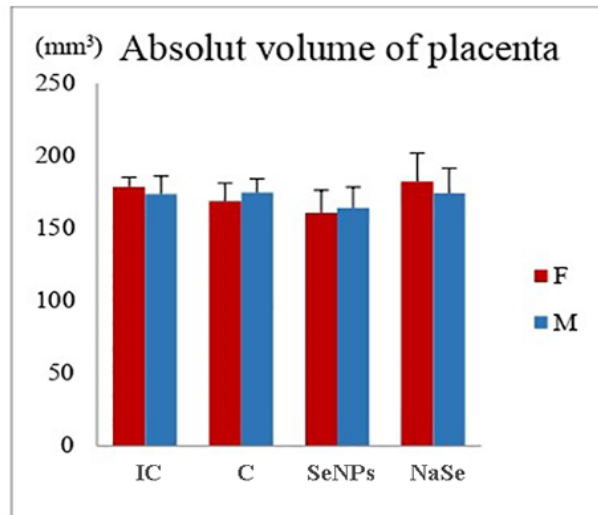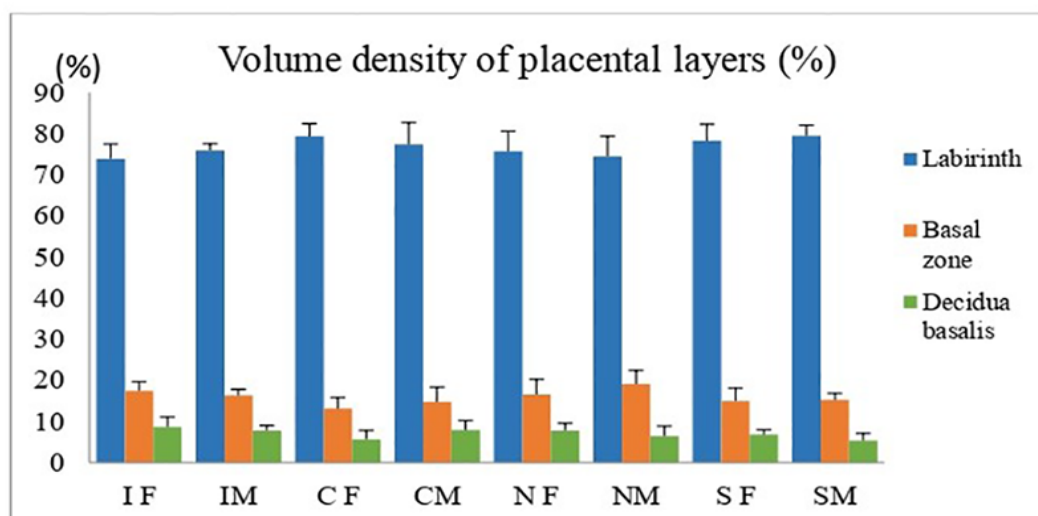

**Figure S3.** Synthesis and physicochemical characterization of SeNPs. A – Schematic presentation of the synthesis procedure with a macroscopic image of the obtained colloidal solution and lyophilized SeNPs. B, C – FTIR spectrum and XRD pattern of freeze-dried SeNPs, respectively. D, E – FE-SEM and TEM images of SeNPs, respectively.

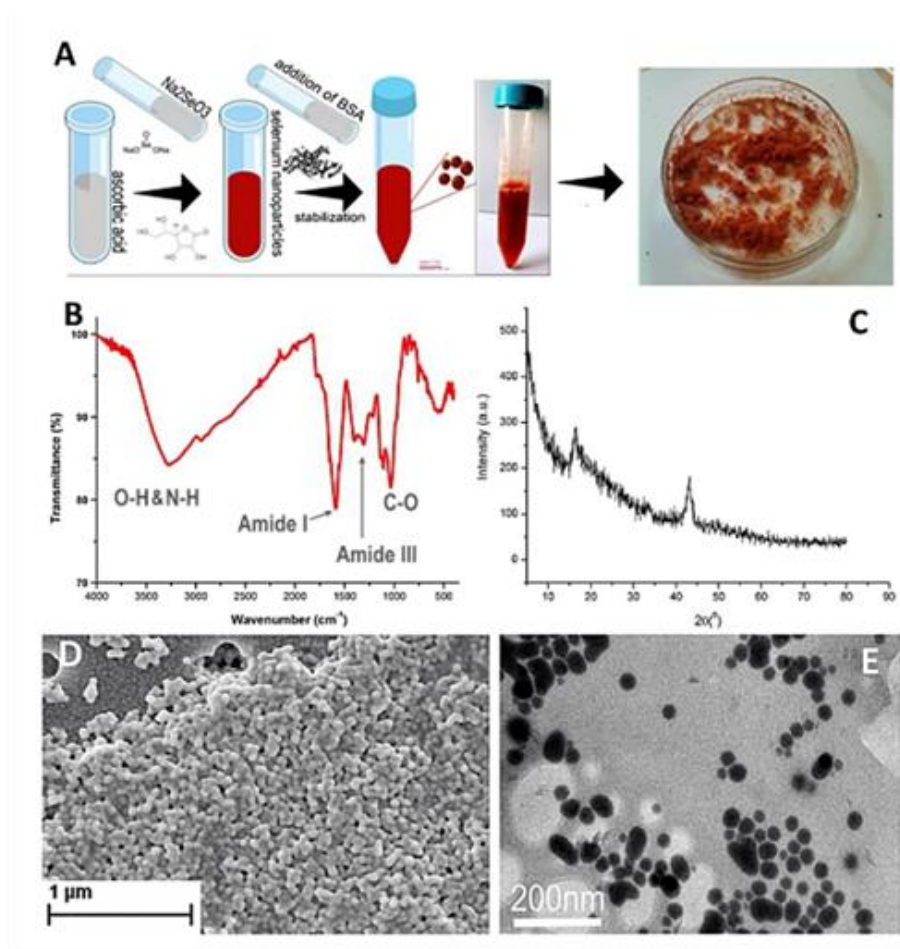

Supplement: s1 [file s1]
